# Supplementary material for: Predictors of adherence to home-based cardiac rehabilitation program among coronary artery disease outpatients in China
Source: PubMed Central journal article supplement — J Geriatr Cardiol. 2019 Oct;16(10):749–55. doi: 10.11909/j.issn.1671-5411.2019.10.003 (PMC6828607; doi:10.11909/j.issn.1671-5411.2019.10.003), 2019-10
Supplement: jgc-16-10-749-supplementary.pdf [file jgc-16-10-749-supplementary.pdf]

## Supplementary Data

### Home-based Exercise Training Adherence Questionnaire (HETAQ)

Please answer the following questions according to the fact since the beginning of your home-based cardiac rehabilitation (CR) exercise program till now.

| Items | Questions                                                            | Category                | Points |
|-------|----------------------------------------------------------------------|-------------------------|--------|
| 1     | I understand the content of CR prescription for me.                  | A. Fully                | 5      |
|       |                                                                      | B. Partially            | 3      |
|       |                                                                      | C. Not at all           | 1      |
| 2     | I myself could hold on to exercise according to the CR prescription. | A. Strictly             | 5      |
|       |                                                                      | B. Often                | 4      |
|       |                                                                      | C. Sometimes            | 3      |
|       |                                                                      | D. Occasionally         | 2      |
|       |                                                                      | E. Never                | 1      |
| 3     | I exercised _____ per day.                                           | A. more than 1 hour     | 5      |
|       |                                                                      | B. 30 minutes-1 hour    | 4      |
|       |                                                                      | C. 10-30 minutes        | 3      |
|       |                                                                      | D. Less than 10 minutes | 2      |
|       |                                                                      | E. Not always           | 1      |
| 4     | I exercised _____ per week.                                          | A. 7 days               | 5      |
|       |                                                                      | B. 5-6 days             | 4      |
|       |                                                                      | C. 3-4 days             | 3      |
|       |                                                                      | D. 1-2 days             | 2      |
|       |                                                                      | E. 0 day                | 1      |
| 5     | I did warm-ups before exercise.                                      | A. Every time           | 5      |
|       |                                                                      | B. Often                | 4      |
|       |                                                                      | C. Sometimes            | 3      |
|       |                                                                      | D. Occasionally         | 2      |
|       |                                                                      | E. Never                | 1      |
| 6     | I did relaxation after exercise.                                     | A. Every time           | 5      |
|       |                                                                      | B. Often                | 4      |
|       |                                                                      | C. Sometimes            | 3      |
|       |                                                                      | D. Occasionally         | 2      |
|       |                                                                      | E. Never                | 1      |
| 7     | I monitored my pulse during exercise.                                | A. Every time           | 5      |
|       |                                                                      | B. Often                | 4      |
|       |                                                                      | C. Sometimes            | 3      |
|       |                                                                      | D. Occasionally         | 2      |
|       |                                                                      | E. Never                | 1      |
| 8     | I kept an exercise diary.                                            | A. Every time           | 5      |
|       |                                                                      | B. Often                | 4      |
|       |                                                                      | C. Sometimes            | 3      |
|       |                                                                      | D. Occasionally         | 2      |
|       |                                                                      | E. Never                | 1      |
| 9     | I felt in need of a doctor or nurse to urge me to exercise.          | A. Strongly agree       | 1      |
|       |                                                                      | B. Partially agree      | 3      |
|       |                                                                      | C. Disagree             | 5      |
| 10    | I felt in need of my family or friends to urge me to exercise.       | A. Strongly agree       | 1      |
|       |                                                                      | B. Partially agree      | 3      |
|       |                                                                      | C. Disagree             | 5      |
| 11    | I turned to doctors and nurses when having problems during exercise. | A. every time           | 4      |
|       |                                                                      | B. usually              | 3      |
|       |                                                                      | C. not usually, because | 2      |
|       |                                                                      | D. not at all, because  | 1      |

| Items | Questions                                                                           | Category                                   | Points |
|-------|-------------------------------------------------------------------------------------|--------------------------------------------|--------|
| 12    | When I felt the exercise program was not effective enough, I _____.                 | A. Turned to doctors and nurses            | -      |
|       |                                                                                     | B. Turned to family and friends            | -      |
|       |                                                                                     | C. Turned to CR peers                      | -      |
|       |                                                                                     | D. Increased the amount of exercise myself | -      |
|       |                                                                                     | E. Decreased the amount of exercise myself | -      |
|       |                                                                                     | F. Stopped the exercise                    | -      |
| 13    | My family and friends understand about my CR prescription.                          | A. Very well                               | 4      |
|       |                                                                                     | B. Basically                               | 3      |
|       |                                                                                     | C. A little                                | 2      |
|       |                                                                                     | D. Not at all                              | 1      |
| 14    | My family and friends cared about my CR program.                                    | A. Very much                               | 4      |
|       |                                                                                     | B. Generally                               | 3      |
|       |                                                                                     | C. Occasionally                            | 2      |
|       |                                                                                     | D. Not at all                              | 1      |
| 15    | My family and friends prompted me to exercise every day.                            | A. Every day                               | 4      |
|       |                                                                                     | B. Some times                              | 3      |
|       |                                                                                     | C. Occasionally                            | 2      |
|       |                                                                                     | D. Never                                   | 1      |
| 16    | I received support from my family and friends when exercising.                      | A. Fully support                           | 4      |
|       |                                                                                     | B. Support                                 | 3      |
|       |                                                                                     | C. No care                                 | 2      |
|       |                                                                                     | D. Objection                               | 1      |
| 17    | My family and friends exercised together with me.                                   | A. Always                                  | 4      |
|       |                                                                                     | B. Some times                              | 3      |
|       |                                                                                     | C. Occasionally                            | 2      |
|       |                                                                                     | D. Never                                   | 1      |
| 18    | I often communicated with CR peers.                                                 | A. Always                                  | 4      |
|       |                                                                                     | B. Some times                              | 3      |
|       |                                                                                     | C. Occasionally                            | 2      |
|       |                                                                                     | D. Never                                   | 1      |
| 19    | I often exercised together with CR peers and supported each other.                  | A. Always                                  | 4      |
|       |                                                                                     | B. Some times                              | 3      |
|       |                                                                                     | C. Occasionally                            | 2      |
|       |                                                                                     | D. Never                                   | 1      |
| 20    | I consider _____ as the most important in helping me stick to the exercise program. | A. Motivation of myself                    | -      |
|       |                                                                                     | B. Support from doctors and nurses         | -      |
|       |                                                                                     | C. Support from family and friends         | -      |
|       |                                                                                     | D. Support from CR peers                   | -      |
| 21    | I thought the biggest problem holding me back from the exercise program was _____.  | -                                          | -      |
| 22    | My expectations, suggestions and advice for doctors and nurses _____.               | -                                          | -      |

**Interpretation:**

Completion of home-based CR: No.3-No.8;

Perception of patients: No.1;

Will of patients: No.2, No.9, No.10;

Family support: No.13-No.17;

CAD peer support: No.18, No.19.

$$(5 \times 2 - 1 \times 2) \times 100$$

$$\text{Perception of Patients Score} = (\text{Score No.1} - 1) / (5 - 1) \times 100$$

$$\text{Will of Patients Score} = (\text{Score No.2} + \text{Score No.9} + \text{Score No.10} - 1 \times 3) / (5 \times 3 - 1 \times 3) \times 100$$

$$\text{Family Support Score} = (\text{Score No.13} + \text{Score No.14} + \text{Score No.15} + \text{Score No.16} + \text{Score No.17} - 1 \times 5) / (4 \times 5 - 1 \times 5) \times 100$$

$$\text{CAD Peer Support Score} = (\text{Score No.18} + \text{Score No.19} - 1 \times 2) / (5 \times 2 - 1 \times 2) \times 100$$

**Calculation:**

$$\text{Adherence Score} = (\text{Score No.3} + \text{Score No.4} - 1 \times 2) /$$
